# Supplementary material for: The Importance of Visit Notes on Patient Portals for Engaging Less Educated or Nonwhite Patients: Survey Study
Source: PubMed Central journal article supplement (PMC5992450; doi:10.2196/jmir.9196), 2018-05-24
Supplement: jmir_v20i5e191_app2.pdf [file jmir_v20i5e191_app2.pdf]

Appendix 2. Item distribution characteristics and principal component analysis results.

| Item                                                                             | Mean | Standard deviation | Factor loading |
|----------------------------------------------------------------------------------|------|--------------------|----------------|
| How important is reading your notes in:                                          |      |                    |                |
| Understanding your health and medical conditions?                                | 8.1  | 2.3                | 0.914          |
| Feeling informed about your care?                                                | 8.5  | 2.2                | 0.902          |
| Understanding how your provider(s) are thinking about your medical conditions?   | 8.4  | 2.2                | 0.881          |
| Remembering the plan for your care (what your provider(s) suggests you do next)? | 7.2  | 3.0                | 0.834          |
| Helping you make decisions about your care?                                      | 7.3  | 2.9                | 0.890          |

NOTE: 1 factor was kept for PCA based on a minimum Eigenvalue criteria of 1. Chronbach alpha for the 5 items is 0.934.
