# Supplementary material for: The Importance of Visit Notes on Patient Portals for Engaging Less Educated or Nonwhite Patients: Survey Study
Source: PubMed Central journal article supplement (PMC5992450; doi:10.2196/jmir.9196), 2018-05-24
Supplement: jmir_v20i5e191_app3.pdf [file jmir_v20i5e191_app3.pdf]

Multimedia Appendix 3. Percent of patients reporting notes are extremely important for each of 5 health behaviors by patient demographics.

| Demographic*                                                                                                                                                                                                    | Understanding health conditions |         | Informed about care |         | Understanding how provider thinks |         | Remembering care plan |         | Making care decisions |         | Mean summary score 9-10 (extremely important) across all 5 behaviors |         |
|-----------------------------------------------------------------------------------------------------------------------------------------------------------------------------------------------------------------|---------------------------------|---------|---------------------|---------|-----------------------------------|---------|-----------------------|---------|-----------------------|---------|----------------------------------------------------------------------|---------|
| Characteristic                                                                                                                                                                                                  | n (%)                           | P value | n (%)               | P value | n (%)                             | P value | n (%)                 | P value | n (%)                 | P value | n (%)                                                                | P value |
| <b>Education</b>                                                                                                                                                                                                |                                 |         |                     |         |                                   |         |                       |         |                       |         |                                                                      |         |
| ≤High School<br>N=982                                                                                                                                                                                           | 649(66.1)                       | <.0001  | 727(74.0)           | <.0001  | 720(73.3)                         | <.0001  | 613(62.4)             | <.0001  | 612(62.3)             | <.0001  | 601(61.2)                                                            | <.0001  |
| Associates or Bachelors<br>N=2115                                                                                                                                                                               | 1104(52.20)                     |         | 1332(62.98)         |         | 1266(59.86)                       |         | 989(46.76)            |         | 959(45.34)            |         | 915(43.26)                                                           |         |
| Masters or Doctoral<br>N=2957                                                                                                                                                                                   | 1423(48.12)                     |         | 1783(60.30)         |         | 1666(56.34)                       |         | 1069(36.15)           |         | 1105(37.37)           |         | 1047(35.41)                                                          |         |
| <b>Race/Ethnicity</b>                                                                                                                                                                                           |                                 |         |                     |         |                                   |         |                       |         |                       |         |                                                                      |         |
| Asian<br>N=256                                                                                                                                                                                                  | 164(64.1)                       | <.0001  | 181(70.7)           | .0028   | 166(64.8)                         | .0001   | 142(55.5)             | <.0001  | 144(56.3)             | <.0001  | 138(53.9)                                                            | <.0001  |
| Black<br>N=184                                                                                                                                                                                                  | 118(64.1)                       |         | 130(70.7)           |         | 130(70.7)                         |         | 114(62.0)             |         | 110(59.8)             |         | 109(59.2)                                                            |         |
| Hispanic or Latino<br>N=219                                                                                                                                                                                     | 130(59.4)                       |         | 153(69.9)           |         | 151(69.0)                         |         | 135(61.6)             |         | 128(58.5)             |         | 126(57.5)                                                            |         |
| White<br>N=5097                                                                                                                                                                                                 | 2607(51.15)                     |         | 3188(62.55)         |         | 3016(59.17)                       |         | 2132(41.83)           |         | 2154(42.26)           |         | 2053(40.28)                                                          |         |
| Other/Multiple Races<br>N=186                                                                                                                                                                                   | 106(57.0)                       |         | 123(66.1)           |         | 124(66.7)                         |         | 96(51.6)              |         | 90(48.4)              |         | 92(49.5)                                                             |         |
| <b>Self-reported Health</b>                                                                                                                                                                                     |                                 |         |                     |         |                                   |         |                       |         |                       |         |                                                                      |         |
| Excellent<br>N=918                                                                                                                                                                                              | 503(54.8)                       | .0026   | 604(65.8)           | .1074   | 569(62.0)                         | .0007   | 410(44.7)             | .0076   | 412(44.9)             | .0180   | 413(45.0)                                                            | .0023   |
| Very good<br>N=2439                                                                                                                                                                                             | 1237(50.72)                     |         | 1524(62.48)         |         | 1411(57.85)                       |         | 1025(42.03)           |         | 1025(42.03)           |         | 974(39.93)                                                           |         |
| Good<br>N=1962                                                                                                                                                                                                  | 1009(51.43)                     |         | 1224(62.39)         |         | 1183(60.30)                       |         | 874(44.55)            |         | 884(45.06)            |         | 831(42.35)                                                           |         |
| Fair/Poor<br>N=757                                                                                                                                                                                              | 437(57.7)                       |         | 499(65.9)           |         | 499(65.9)                         |         | 371(49.0)             |         | 364(48.1)             |         | 354(46.8)                                                            |         |
| *NOTE: All P-values from chi-square test. Of the 6391 patents included in the analysis 337 were missing data on education, 315 were missing data on general health and 449 were missing data on race/ethnicity. |                                 |         |                     |         |                                   |         |                       |         |                       |         |                                                                      |         |
